# Supplementary material for: Computational Methods for the Identification of Molecular Targets of Toxic Food Additives. Butylated Hydroxytoluene as a Case Study
Source: PubMed Central journal article supplement (PMC7248939; doi:10.3390/molecules25092229), 2020-05-09
Supplement: molecules-25-02229-s001.pdf [file molecules-25-02229-s001.pdf]

# Computational methods for the identification of molecular targets of toxic food additives. Butylated hydroxytoluene as a case study

Valentina Tortosa<sup>1</sup>, Valentina Pietropaolo<sup>1</sup>, Valentina Brandi<sup>1</sup>, Gabriele Macari<sup>1</sup>, Andrea Pasquadibisceglie<sup>1</sup>, and Fabio Polticelli<sup>1,2,\*</sup>

<sup>1</sup>Department of Sciences, Roma Tre University, 00146 Rome, Italy

<sup>2</sup>National Institute of Nuclear Physics, Roma Tre University, 00146 Rome, Italy

\*Correspondence: Prof. Fabio Polticelli; [fabio.polticelli@uniroma3.it](mailto:fabio.polticelli@uniroma3.it); Tel.: +39-06-5733-6362 (F.L.)

Academic editor:

Received: date; Accepted: date; Published: date

## Supplementary Methods

### 1. ChEMBL compounds virtual screening

The list of tested compounds has been retrieved from ChEMBL using the official python client named *ChEMBL webresource client* [1]. The ChEMBL IDs used were: CHEMBL221 for hNET; CHEMBL222 for COX-1; CHEMBL2095172 for GABA-AR  $\alpha$ -1/ $\beta$ -2/ $\gamma$ -2 receptor; CHEMBL2094121 for GABA-AR  $\alpha$ -1/ $\beta$ -3/ $\gamma$ -2 receptor; CHEMBL225 for 5-HT<sub>2c</sub>R; CHEMBL1833 for 5-HT<sub>2b</sub>R. Where possible *K<sub>i</sub>* data were used, with the exception of COX-1 and GABA-AR  $\alpha$ -1/ $\beta$ -2/ $\gamma$ -2 for which the IC<sub>50</sub> values were used. Affinity values not expressed in nM were filtered out. For each target a sampling procedure of the compounds has been performed as follows: all affinity data were converted in *pK<sub>i</sub>/pIC<sub>50</sub>*; the data have been then divided into bins on the basis of the integer part of their value. For each bin, if possible, 30 compounds were randomly sampled. If a bin contained less than 30 compounds, all the compounds were taken instead. The total number of compounds for each target is reported in table S1. For each target-compounds pair library the docking simulations were performed using the same settings chosen for BHT and AutoDock Vina. Compounds were divided in strong binders if their *pK<sub>i</sub>/pIC<sub>50</sub>* values were greater than 6, otherwise they were defined weak binders. Due to the issues already discussed in the main text, GABA-AR  $\beta$ 3+ $\alpha$ - interface was not taken into consideration in these further tests. The results of this analysis are illustrated in Figures 1SM-6SM.

| Target                                       | Compounds number |
|----------------------------------------------|------------------|
| GABA-AR $\alpha$ -1/ $\beta$ -2/ $\gamma$ -2 | 149              |
| GABA-AR $\alpha$ -1/ $\beta$ -3/ $\gamma$ -2 | 75               |
| 5-HT <sub>2b</sub> R                         | 148              |
| 5-HT <sub>2c</sub> R                         | 165              |
| COX-1                                        | 180              |
| hNET                                         | 212              |

**Table 1SM.** Total number of compounds used for the virtual screening against each target.

### 2. ADME analysis

Assessment of absorption, distribution, metabolism and excretion (ADME) is a crucial part of drug development. Computational approaches can be used in place of experimental methodology to cut both time and cost. SwissADME is a web server for the prediction of small molecules physicochemical properties such as, but not limited to, pharmacokinetics properties and drug-likeness [2]. It employs several predictive models and when possible, it adopts a consensus approach (e.g. for lipophilicity prediction). In this work, ADME analysis has been performed in order to predict if BHT could reach the identified targets (Figure 7SM).

### GABA-AR $\alpha$ -1/ $\beta$ -2/ $\gamma$ -2

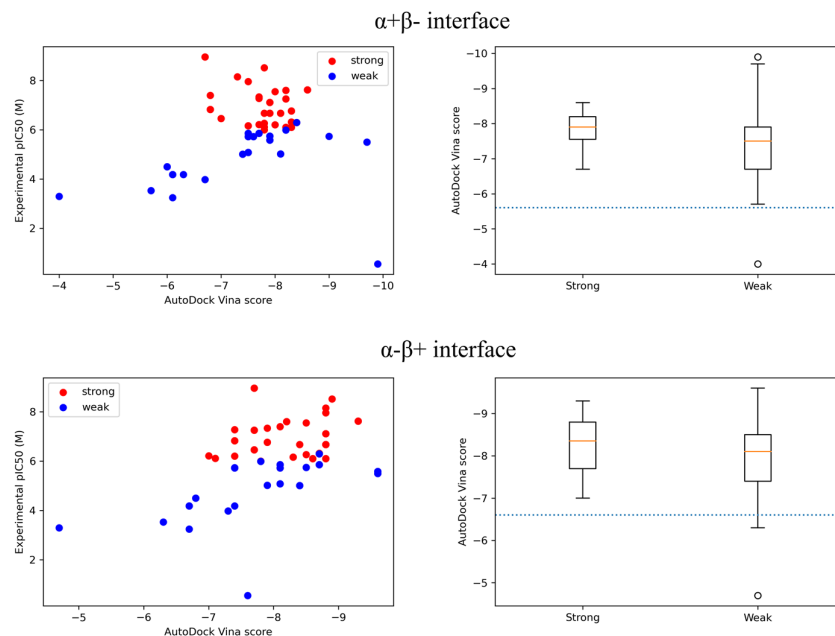

**Figure 1SM.** Virtual screening results for  $\alpha$ + $\beta$ 2- (above) and  $\alpha$ - $\beta$ 2+ (below) interfaces of the GABA-AR  $\alpha$ -1/ $\beta$ -2/ $\gamma$ -2. In the scatterplots (on the left) are plotted the experimental results ( $pIC_{50}$ ) against the AutoDock Vina score results for the weak (blue) and strong (red) binders; in the box plots (on the right) are depicted the AutoDock Vina results distribution for strong and weak binders. The score for BHT (-5.6 kcal/mol for  $\alpha$ + $\beta$ 2- and -6.6 kcal/mol for  $\alpha$ - $\beta$ 2+) is represented as a dotted blue line.

### GABA-AR $\alpha$ -1/ $\beta$ -3/ $\gamma$ -2

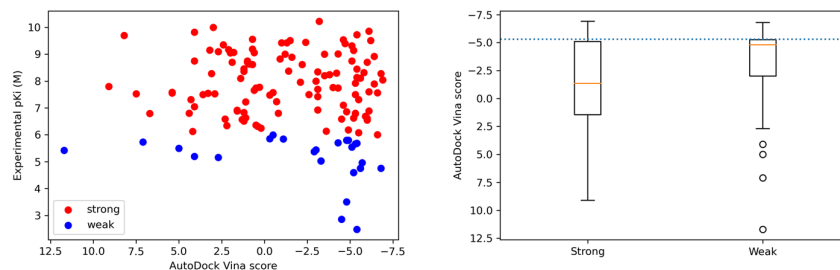

**Figure 2SM.** Virtual screening results for  $\alpha$ + $\beta$ 3- interface of the GABA-AR  $\alpha$ -1/ $\beta$ -3/ $\gamma$ -2. In the scatterplot (on the left) are plotted the experimental results ( $pKi$ ) against the AutoDock Vina score results for the weak (blue) and strong (red) binders; in the box plot (on the right) are depicted the AutoDock Vina results distribution for strong and weak binders. The score for BHT (-5.3 kcal/mol for  $\alpha$ + $\beta$ 3-) is represented as a dotted blue line.

### 5-HT<sub>2B</sub>R

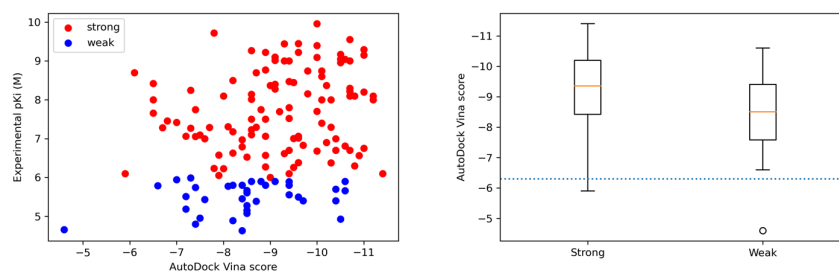

**Figure 3SM.** Virtual screening results for 5-HT<sub>2B</sub>R. In the scatterplot (on the left) are plotted the experimental results ( $pK_i$ ) against the AutoDock Vina score results for the weak (blue) and strong (red) binders; in the box plot (on the right) are depicted the AutoDock Vina results distribution for strong and weak binders. The score for BHT (-7.0 kcal/mol) is represented as a dotted blue line.

### 5-HT<sub>2C</sub>R

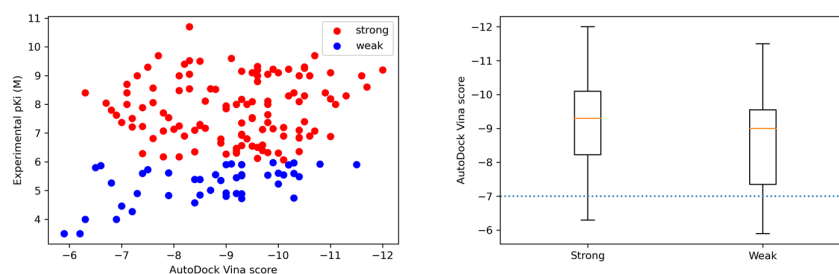

**Figure 4SM.** Virtual screening results for 5-HT<sub>2C</sub>R. In the scatterplot (on the left) are plotted the experimental results ( $pK_i$ ) against the AutoDock Vina score results for the weak (blue) and strong (red) binders; in the box plot (on the right) are depicted the AutoDock Vina results distribution for strong and weak binders. The score for BHT (-7.7 kcal/mol) is represented as a dotted blue line.

### COX-1

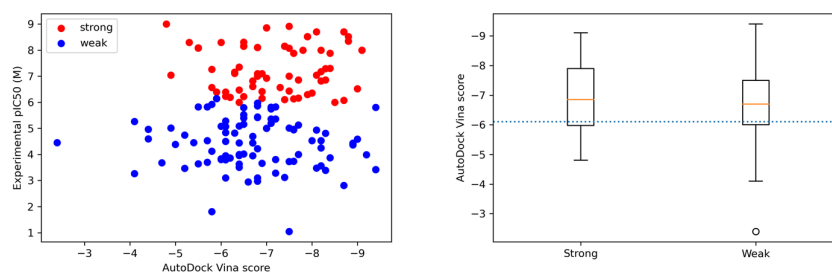

**Figure 5SM.** Virtual screening results for COX-1. In the scatterplot (on the left) are plotted the experimental results ( $pIC_{50}$ ) against the AutoDock Vina score results for the weak (blue) and strong (red) binders; in the box plot (on the right) are depicted the AutoDock Vina results

distribution for strong and weak binders. The score for BHT (-6.1 kcal/mol) is represented as a dotted blue line.

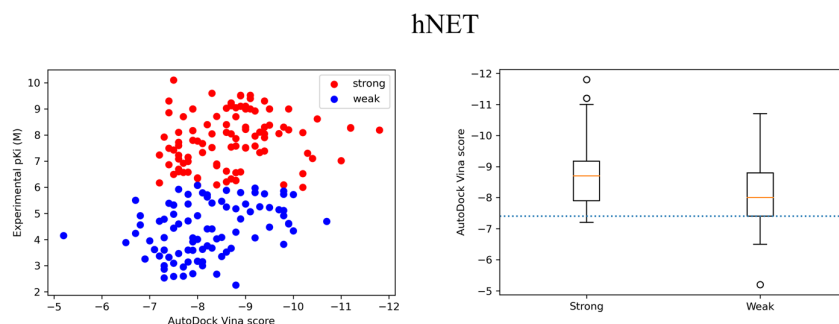

**Figure 6SM.** Virtual screening results for hNET. In the scatterplot (on the left) are plotted the experimental results ( $pKi$ ) against the AutoDock Vina score results for the weak (blue) and strong (red) binders; in the box plot (on the right) are depicted the AutoDock Vina results distribution for strong and weak binders. The score for BHT (-7.4 kcal/mol) is represented as a dotted blue line.

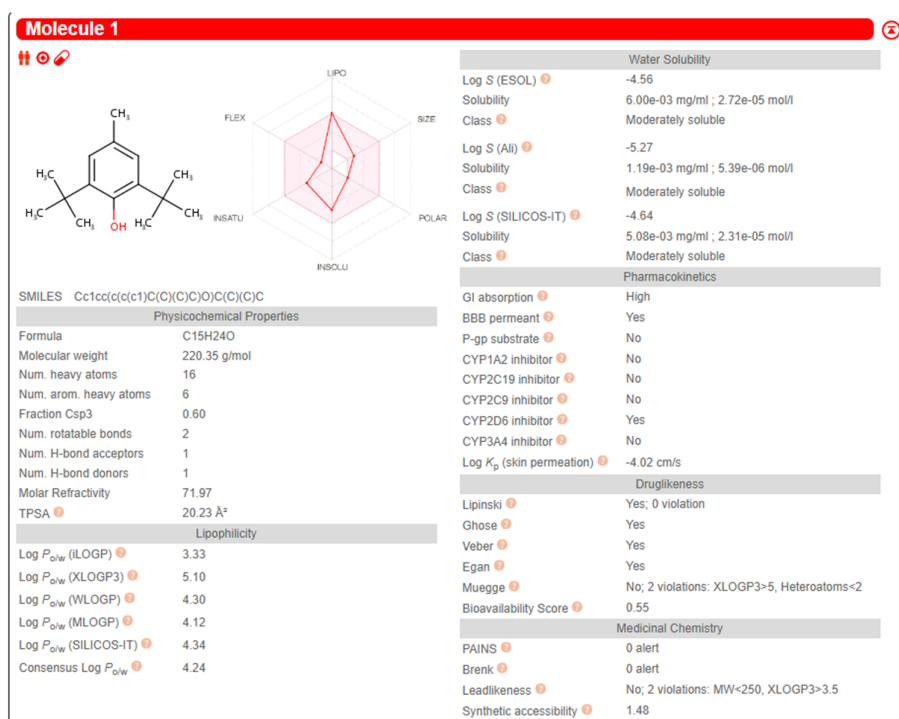

**Figure 7SM.** ADME analysis performed with SwissADME.

## References

1. Gaulton, A., Bellis, L. J., Bento, A. P., Chambers, J., Davies, M., Hersey, A., Light, Y., McGlinchey, S., Michalovich, D., Al-Lazikani, B., & Overington, J. P. ChEMBL: a large-scale bioactivity database for drug discovery. *Nucleic acids res.* **2012**, *40(Database issue)*, D1100–D1107.
2. Daina, A., Michielin, O. & Zoete, V. SwissADME: a free web tool to evaluate pharmacokinetics, drug-likeness and medicinal chemistry friendliness of small molecules. *Sci Rep.* **2017**, *7*, 42717.
